# Supplementary material for: Porous SnO2 nanocubes with controllable pore volume and their Li storage performance
Source: Royal Society of Chemistry journal article supplement (doi:10.1039/c4ra00362d), 2014-01-01
Supplement: c4ra00362d1.pdf [file c4ra00362d1.pdf]

## Electronic Supplementary Information

### Synthesis of porous SnO<sub>2</sub> nanocube anodes for Li-ion batteries

Wei Wei, Sen Gao, Zhao Yang, Yongmin Wu, Chang Chen, Lin

Guo\* and Jinghong Li <sup>b\*</sup>

**Table 1.** The pore volume and specific surface area data of CaSnO<sub>3</sub>, S8, S10, S12, S14 and S16.

| Sample name        | pore volume<br>(cc/g) | Specific surface area<br>(m <sup>2</sup> /g) |
|--------------------|-----------------------|----------------------------------------------|
| CaSnO <sub>3</sub> | 0.008                 | 9.16                                         |
| S8                 | 0.332                 | 150.82                                       |
| S10                | 0.257                 | 113.23                                       |
| S12                | 0.164                 | 86.24                                        |
| S14                | 0.116                 | 74.65                                        |
| S16                | 0.092                 | 60.39                                        |

**Table 2.** The pore volume and specific surface area data of  $\text{CaSn}(\text{OH})_6$ , M1, M2 and M3.

| Sample name                | pore volume | Specific surface area     |
|----------------------------|-------------|---------------------------|
|                            | (cc/g)      | ( $\text{m}^2/\text{g}$ ) |
| $\text{CaSn}(\text{OH})_6$ | 0.006       | 6.26                      |
| M1                         | 0.121       | 106.35                    |
| M2                         | 0.244       | 117.34                    |
| M3                         | 0.293       | 155.33                    |

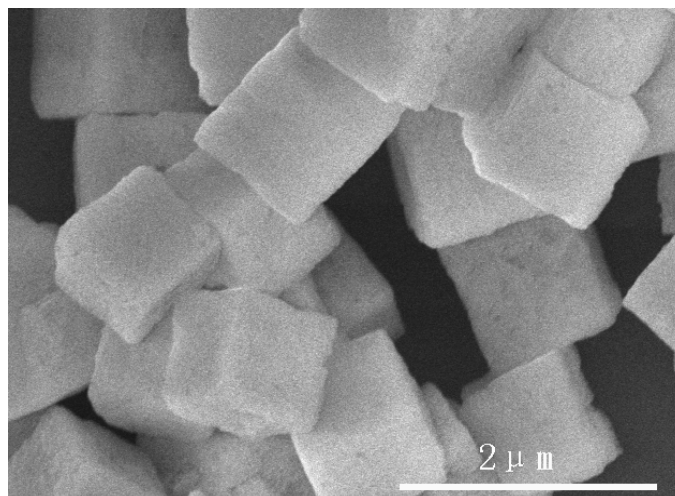

Figure S1. SEM image of  $\text{CaSn}(\text{OH})_6$  microcubes.

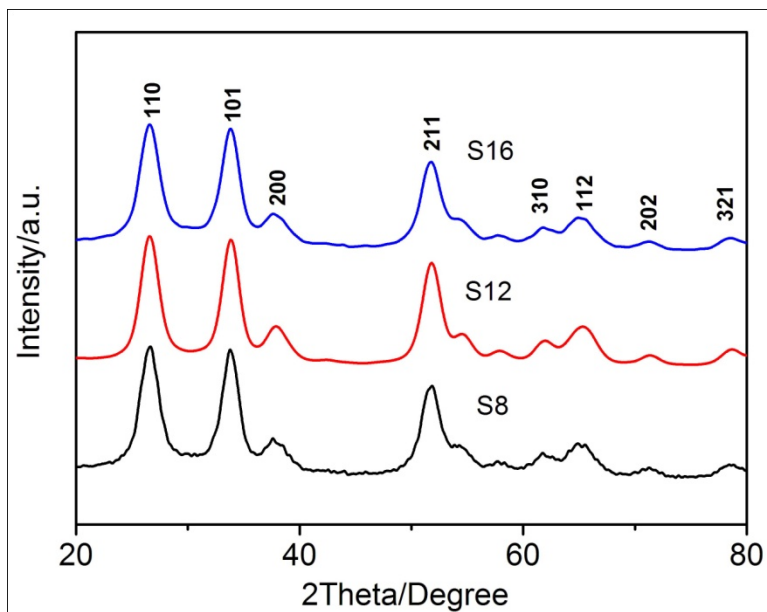

Figure S2. XRD patterns of S8, S12 and S16.

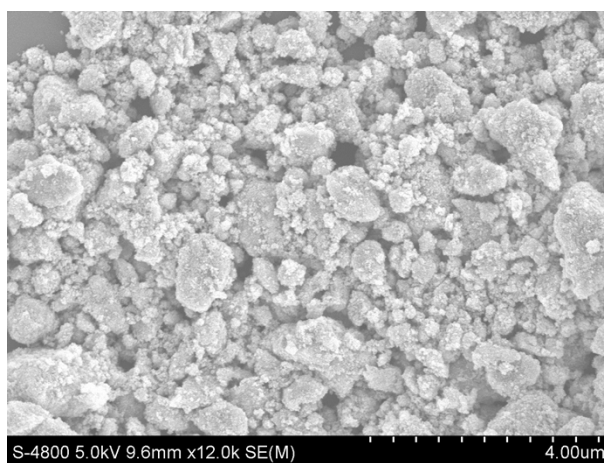

Figure S3. SEM image of the irregular  $\text{SnO}_2$  nanoparticles agglomerate obtained by  $\text{CaSnO}_3$  cubes immersed in  $8\text{mol}\cdot\text{L}^{-1}$  nitric acid for 16 h.

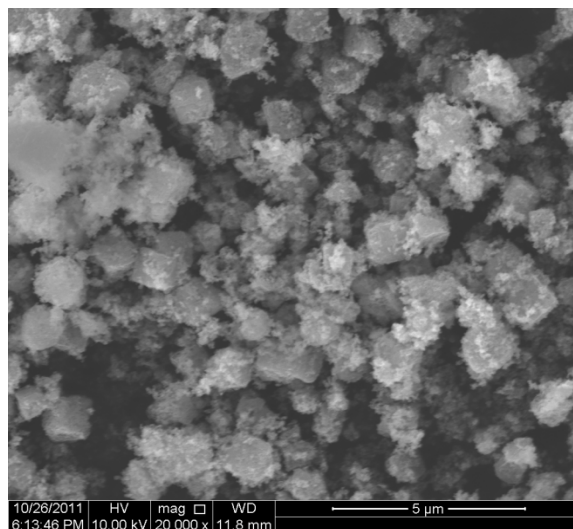

Figure S4. SEM image of the SnO<sub>2</sub> product obtained after 6 h HNO<sub>3</sub> treatment. The products are consisted of damaged cubes and irregular nanoparticles.

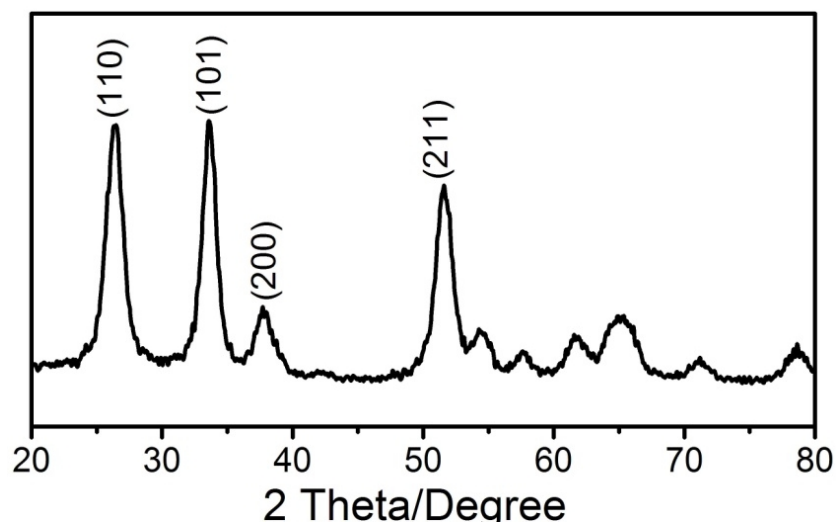

Figure S5. XRD patterns of S2.

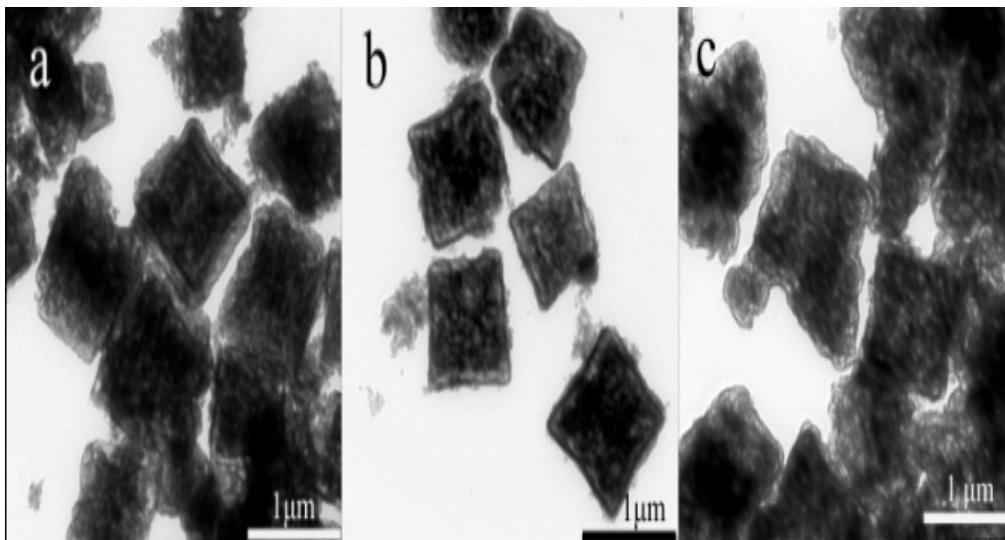

**Figure S6.** TEM images of a) S8, b) S10 and c) S14 at the end of 10th charge/discharge cycle.
